# Supplementary material for: Vascular risk factors and astrocytic marker for the glymphatic system activity
Source: Springer Nature journal article supplement (doi:10.1007/s11547-023-01675-w), 2023-07-18
Supplement: MOESM1 [file 11547_2023_1675_MOESM1_ESM.pdf]

# eAppendix 1

## Cognitive test

MoCA was developed in 2005 for detecting early cognitive impairment<sup>1</sup> and was well-validated in Taiwan.<sup>2</sup> It contained structured tasks covering orientation, executive function, visuospatial skills, attention, calculation, working memory, delayed recall, and language for a global evaluation of cognition. The total score ranged from 0 (worst) to 30 (best) with an additive one-point correction for education years  $\leq 12$  years.<sup>1</sup> A cutoff score of 23/24 was suggested by the Taiwan version of MoCA for identifying mild cognitive impairment (MCI) with 92% sensitivity and 78% specificity.<sup>2</sup>

ADAS-cog was invented in 1984 for cognitive assessment of mild to severe Alzheimer's dementia.<sup>3</sup> It evaluated global cognition by 11 items for memory, praxis, and memory domains, with a total score from 0 (best) to 70 (worst). The Taiwan version of ADAS-cog in traditional Chinese had been validated in community-dwelling older adults.<sup>4</sup>

## Image acquisition

MRI scans were performed on a Siemens 3T Skyra MR scanner equipped with a 20-channel head and neck coil at Chang Gung Memorial Hospital, Keelung, Taiwan. All participants received identical pulse sequences, including a set of high-resolution T1-weighted image (T1w) using a 3D Magnetization-Prepared Rapid Gradient Echo (MPRAGE) sequence (TR/TE = 2200/2.45 ms, TI = 900 ms, field-of-view (FOV) = 256 mm  $\times$  256 mm<sup>2</sup>, flip angle = 8°, matrix size = 256  $\times$  256, 176 sagittal slices, slice thickness = 1 mm, no gap). The MR scans also collected a set of diffusion-weighted images (DWIs) using single-shot spin-echo echo-planar diffusion-weighted images (TR/TE = 8500/99 ms, matrix size = 108  $\times$  108, 50 contiguous slices, voxel size = 2.37  $\times$  2.37  $\times$  2.4 mm<sup>3</sup>) with two b-values of 1500 s/mm<sup>2</sup> (30 diffusion directions) and 3000 s/mm<sup>2</sup> (64 diffusion directions), plus two b=0 images in posterior to anterior phase encoding direction. Another b=0 image in anterior to posterior phase encoding direction was acquired for susceptibility distortion correction.

## Image preprocessing

MRI data were all processed using the iDIO pipeline (<https://github.com/iDIO4dMRI/iDIO>)<sup>5</sup> that included functions of MRtrix3 (<https://www.mrtrix.org/>),<sup>6</sup> FSL (<https://fsl.fmrib.ox.ac.uk/>),<sup>7</sup> ANTs (<http://stnava.github.io/ANTs/>),<sup>8</sup> and PreQual

(<https://github.com/MASILab/PreQual>).<sup>9</sup> The DWIs preprocessing procedures included image denoising (MRtrix3 command: `dwidenoise`),<sup>10, 11</sup> Gibbs ringing removal (MRtrix3 command: `mrdegibbs`),<sup>12</sup> susceptibility-induced distortion, eddy current and subject movement correction (FSL command: `topup` and `eddy`), B1 field inhomogeneity correction (MRtrix3 command: `dwibiascorrect`)<sup>13</sup> and imaging resampling into 2 mm<sup>3</sup> isotropic voxels. T1w image preprocessing includes Gibbs-ringing artifact removal (MRtrix3 command: `mrdegibbs`)<sup>12</sup> and B1 field inhomogeneity bias correction (ANTs command: `N4BiasFieldCorrection` command), both of which can improve skull stripping. A skull-stripped brain mask is generated using the `antsBrainExtraction` in ANTs. Next, image registration from T1 to DWI uses the boundary-based registration method (FLIRT in FSL).<sup>14, 15</sup> T1w brain mask is then transformed into DWI space for further usage. Last, using the brain mask with preprocessed DWIs, DWIs with b-values lower than 1500 s/mm<sup>2</sup> are extracted and analyzed using the diffusion tensor model with weighted least square (FSL command: `dtifit`).<sup>16</sup>

## Reference

1. Nasreddine ZS, Phillips NA, Bedirian V, et al. The Montreal Cognitive Assessment, MoCA: a brief screening tool for mild cognitive impairment. *J Am Geriatr Soc* 2005;53:695-699.
2. Tsai C-F, Lee W-J, Wang S-J, Shia B-C, Nasreddine Z, Fuh J-L. Psychometrics of the Montreal Cognitive Assessment (MoCA) and its subscales: validation of the Taiwanese version of the MoCA and an item response theory analysis. *International Psychogeriatrics* 2011;24:651-658.
3. Rosen WG, Mohs RC, Davis KL. A new rating scale for Alzheimer's disease. *Am J Psychiatry* 1984;141:1356-1364.
4. Wei YC, Chen CK, Lin C, et al. Normative Data of Mini-Mental State Examination, Montreal Cognitive Assessment, and Alzheimer's Disease Assessment Scale-Cognitive Subscale of Community-Dwelling Older Adults in Taiwan. *Dementia and Geriatric Cognitive Disorders* 2022.
5. Hsu CH, Chong ST, Kung YC, Kuo KT, Huang CC, Lin CP. Integrated diffusion image operator (iDIO): A pipeline for automated configuration and processing of diffusion MRI data. *Hum Brain Mapp* 2023;44:2669-2683.
6. Tournier JD, Smith R, Raffelt D, et al. MRtrix3: A fast, flexible and open software framework for medical image processing and visualisation. *Neuroimage* 2019;202:116137.

7. Jenkinson M, Beckmann CF, Behrens TE, Woolrich MW, Smith SM. Fsl. Neuroimage 2012;62:782-790.
8. Avants BB, Tustison NJ, Song G. Advanced normalization tools (ANTs). Insight j 2009;2:1-35.
9. Cai LY, Yang Q, Hansen CB, et al. PreQual: An automated pipeline for integrated preprocessing and quality assurance of diffusion weighted MRI images. Magn Reson Med 2021;86:456-470.
10. Veraart J, Fieremans E, Novikov DS. Diffusion MRI noise mapping using random matrix theory. Magn Reson Med 2016;76:1582-1593.
11. Veraart J, Novikov DS, Christiaens D, Ades-Aron B, Sijbers J, Fieremans E. Denoising of diffusion MRI using random matrix theory. Neuroimage 2016;142:394-406.
12. Kellner E, Dhital B, Kiselev VG, Reisert M. Gibbs-ringing artifact removal based on local subvoxel-shifts. Magn Reson Med 2016;76:1574-1581.
13. Tustison NJ, Avants BB, Cook PA, et al. N4ITK: improved N3 bias correction. IEEE Trans Med Imaging 2010;29:1310-1320.
14. Jenkinson M, Smith S. A global optimisation method for robust affine registration of brain images. Med Image Anal 2001;5:143-156.
15. Jenkinson M, Bannister P, Brady M, Smith S. Improved optimization for the robust and accurate linear registration and motion correction of brain images. Neuroimage 2002;17:825-841.
16. Basser PJ, Mattiello J, LeBihan D. Estimation of the effective self-diffusion tensor from the NMR spin echo. J Magn Reson B 1994;103:247-254.
